# Supplementary material for: Green Nanosilicas for Monoaromatic Hydrocarbons Removal from Air
Source: Springer Nature journal article supplement (doi:10.1007/s12633-020-00924-1), 2021-01-22
Supplement: MOESM1 [file 12633_2020_924_MOESM1_ESM.docx]

**SUPPORTING INFORMATION**

Green Nanosilicas for monoaromatic hydrocarbons removal from air

Abdunaser M. Ewlad-Ahmed, Michael A. Morris, Justin Holmes, David J. Belton, Siddharth V. Patwardhan* and Lorraine T. Gibson.*

**Fig S1** Normalised capacities of MCM-41 and GN.

**Fig S2** V-t plot for the nitrogen gas adsorption analysis used for micropore measurement of GN30-11.

*
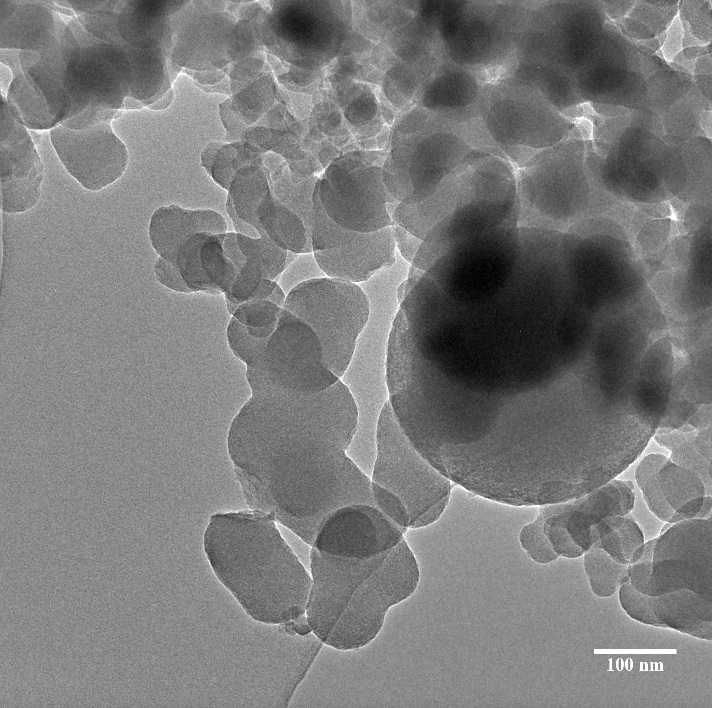
*

**Fig S3** Representative TEM image of GN30-11. Scale bar = 100 nm
